# Supplementary material
Source: publisher figshare collection journal article supplement (https://future-science-group.figshare.com/ndownloader/files/35154973)
Supplement: Supplementary file 1 [file 35154973]

| Supplementary Table 1. | |  |  |
| --- | --- | --- | --- |
| *Neuropsychological Test Z-Scores (N = 23)* | | | |
| Neuropsychological Measures | | Mean (*SD*) | Range |
|  | Digit Span Total | -0.16 (2.30) | -1.67 – 1.67 |
|  | HVLTR Total | -1.30 (3.70) | -3.00 – 1.20 |
|  | HVLTR Delayed Recall | -0.93 (3.68) | -3.00 – 0.90 |
|  | HVLTR Recognition | -0.27 (3.71) | -3.00 – 1.00 |
|  | Coding Total | -4.10 (4.73) | -4.60 – -3.60 |
|  | Rey-O Copy | -1.86 (2.38) | -7.48 – 0.73 |
|  | BNT-2 Total | -0.99 (3.68) | -3.10 – 1.70 |
|  | Letter Fluency Total | -0.84 (3.69) | -3.80 – 1.70 |
|  | Animal Naming Test | -0.87 (3.72) | -3.40 – 1.20 |
|  | Stroop Word Reading | -1.04 (3.69) | -3.50 – 1.50 |
|  | Stroop Color Naming | -1.21 (3.72) | -4.00 – 0.90 |
|  | Stroop Color-Word | -0.32 (3.55) | -2.60 – 3.90 |
|  | Stroop Interference | 0.07 (4.06) | -1.50 – 3.00 |
|  | Trail A Time | -0.26 (3.93) | -2.80 – 1.70 |
|  | Trail B Time | -0.43 (3.63) | -2.60 – 2.40 |
|  | BVMT-R Total | -1.05 (3.82) | -3.00 – 1.20 |
|  | BVMT-R Delayed Recall | -0.97 (3.49) | -4.00 – 1.30 |
| Notes: Z-scores were derived from published norms; Abbreviations: BNT-2, Boston Naming Test, 2nd edition; BVMT-R, Brief Visuospatial Memory Test-Revised; HVLT-R, Hopkins Verbal Learning Test-Revised; Rey-O, Rey-Osterrieth complex figure test; Stroop, Stroop Golden; Trail A & B, Trail Making Test; Digit Span and Coding, Wechsler Adult Intelligence Scale-IV. | | | |
